# Supplementary material for: A low-deactivation-rate Lewis acid zeolite prepared in an alkali metal ion-containing system for alkene epoxidation
Source: Royal Society of Chemistry journal article supplement (doi:10.1039/c6ra17891j), 2016-01-01
Supplement: c6ra17891j1.pdf [file c6ra17891j1.pdf]

Supporting Information for

## A low-deactivation-rate Lewis acid zeolite prepared in an alkali metal ion-containing system for alkene epoxidation

Kai-Rui Fu,<sup>†a</sup> Ji-Kang Yao,<sup>†a</sup> Qiang Xiao,<sup>b</sup> Hai-Xia Liu,<sup>a</sup> Tian-Duo Li,<sup>\*a</sup> Takashi Tatsumi<sup>c</sup> and Jin-Gui Wang<sup>\*a</sup>

- <sup>a</sup> Shandong Provincial Key Laboratory of Fine Chemicals, School of Chemistry and Pharmaceutical Engineering, Qilu University of Technology, Jinan 250353 P.R. China. E-mail: JGWang@qlu.edu.cn; litianduo@163.com
- <sup>b</sup> Key Laboratory of the Ministry of Education for Advanced Catalysis Materials, Institute of Physical Chemistry, Zhejiang Normal University, 321004, Jinhua, P.R. China
- <sup>c</sup> Catalytic Chemistry Division, Chemical Resources Laboratory, Tokyo Institute of Technology, 4259 Nagatsuta, Midori-ku, Yokohama 2268503, Japan

### Detailed experimental procedures

#### Chemicals and materials

Titanium tetra-n-butoxide and tetraethylorthosilicate were purchased from Aldrich. Tetrapropylammonium hydroxide (TPAOH) and Ethylenediaminetetraacetic acid (EDTA) were from Sigma-Aldrich. Reagents of 1-hexene and 1,2-epoxyhexane were purchased from TCI. Hydrogen peroxide (H<sub>2</sub>O<sub>2</sub>, 30 wt. % in water) and 0.1 M Ce(SO<sub>4</sub>)<sub>2</sub> were from Macklin. All the chemical agents were used without further purification.

#### Synthesis of TS-1 zeolite catalysts

**TS-1(EDTA)** was synthesized as followed: firstly, titanium tetra-n-butoxide was added to H<sub>2</sub>O<sub>2</sub> aqueous solution to form a stable Ti source of Ti-peroxo complex. Then, an aqueous solution of tetrapropylammonium hydroxide that contains approximately ~10 000 ppm K<sup>+</sup> and ~600 ppm Na<sup>+</sup> was added into above Ti solution followed by the addition of tetraethylorthosilicate under stirring. After 0.5 h, the resultant solution was heated to 353 K for 4 hours to evaporate alcohol generated during the hydrolysis of the Ti and Si precursors. And then EDTA was added. The molar composition of the final mixture was 100 SiO<sub>2</sub>/ 2.5 TiO<sub>2</sub> /36 TPAOH /10 KOH /1 NaOH /130 EDTA /3500 H<sub>2</sub>O. The final mixture was transferred into an autoclave and treated at 443 K for 2 days under static condition. The suspended TS-1 crystal was centrifuged, washed with distilled water, and dried at 373 K. The obtained product was treated under calcination at 823 K for 6 h to remove the organic templates.

**TS-1-alkali** was prepared by using the same procedures and gel composition except no EDTA added.

**TS-1-con** was prepared via conventional method in the absence of alkali metal ions and EDTA. The preparation processes were similar to synthesis of TS-1(EDTA).

### **Zeolite characterization**

Powder X-ray diffraction pattern (PXRD) measurements were performed on a Bruker Powder D8 Advance diffractometer at 40 kV and 40 mA using  $\text{CuK}\alpha$  radiation ( $\lambda=1.5418$  Angstrom). Diffuse reflectance ultraviolet-visible (DRUV/Vis) spectrum were recorded on a SHIMADZU UV-2450 spectrophotometer at 298 K using  $\text{BaSO}_4$  as a reference. IR spectrum were recorded as KBr pellets on a SHIMADZU IRPrestige-21 spectrometer. Raman spectra were obtained using a Thermo SCIENTIFIC DXR Raman microscope with an excitation wavelength at 532 nm. Nitrogen adsorption-desorption isotherms were measured on a TriStar II 3020 sorption analyzer at 77 K. Elemental analyses (Si, Ti, Na and K) were performed on an inductively coupled plasma optical emission spectrometer (ICP-OES, Perkin Elmer ICP Optima 2000DV). X-ray Photoelectron Spectra (XPS) were recorded on a Thermo Fisher Scientific ESCALAB 250Xi X-ray Photoelectron spectrometer using Al X-ray source.  $^{29}\text{Si}$  MAS NMR spectra were recorded on a Varian Infinity plus 400 instrument with 8 kHz spin rate. Thermogravimetry (TG) was performed with a TA SDT Q600 apparatus. Field-emission SEM images were obtained on a JEOL JSM-7600F microscope operated at 5 kV. TEM observations were performed on a JEOL JEM-1400 TEM microscope, working at 100 kV. Sample subjected to TEM measurements was dispersed in ethanol ultrasonically and was dropped on copper grids.

### **Catalytic reactions**

Oxidation reactions were performed in a sealed 20 mL glass reactor immersed in a 60 °C oil bath. In a typical run, the reactions were carried out with catalyst (25 mg), 1-hexene (5.0 mmol) and  $\text{H}_2\text{O}_2$  (5.0 mmol) in methanol (5.0 mL) with vigorous stirring for different time. After the reaction, certain amount of cyclohexanone was added as internal standard. The mixture was analyzed by gas chromatography with SE-30 capillary column. The amount of unconverted  $\text{H}_2\text{O}_2$  was determined by titrating with  $\text{Ce}(\text{SO}_4)_2$  aqueous solution (0.1 M). The products were verified using authentic chemicals commercially available.

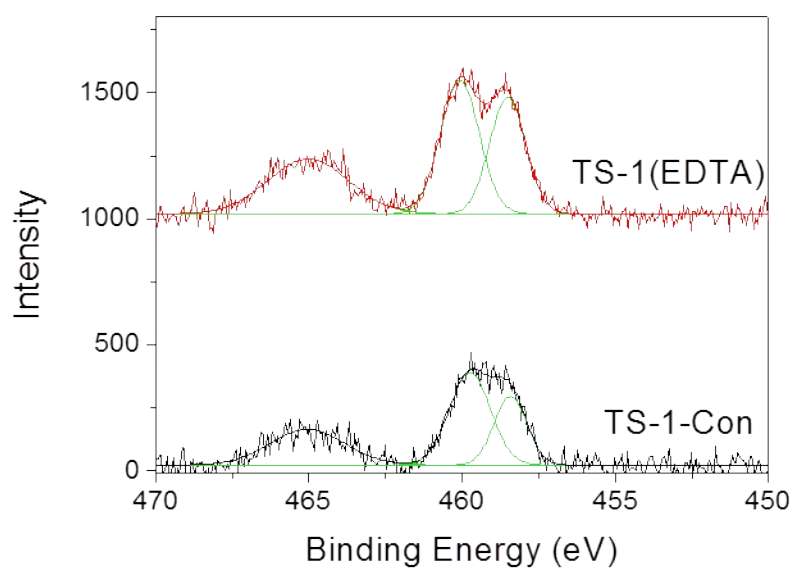

**Fig. S1** XPS spectra at the Ti 2p region for TS-1 zeolite of (a) TS-1-Con and (b) TS-1(EDTA).

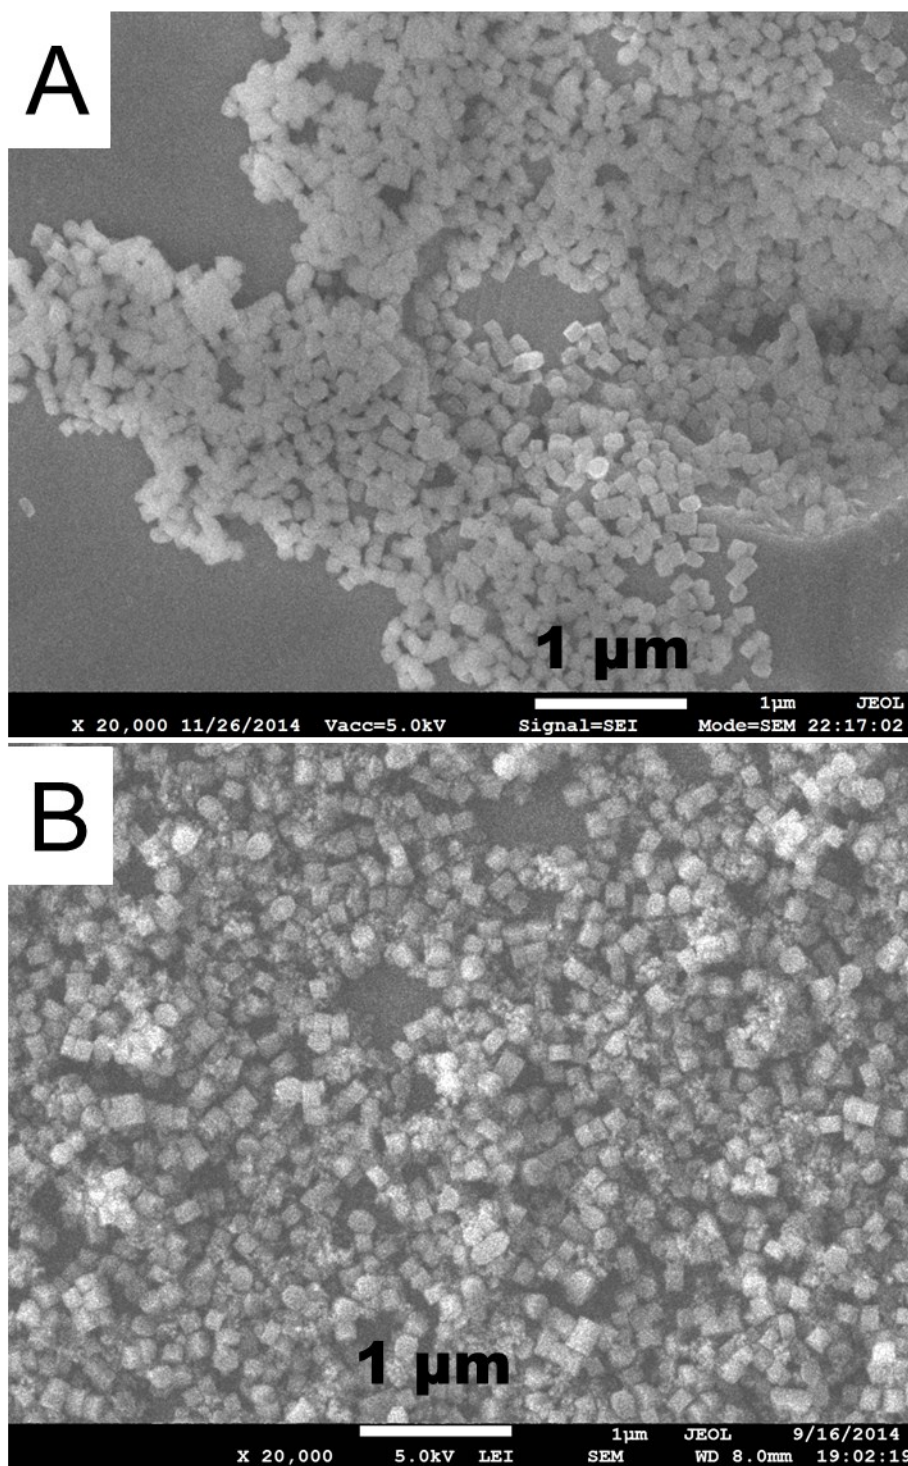

**Fig. S2** SEM images of (A) TS-1-Con and (B) TS-1-Alkali.

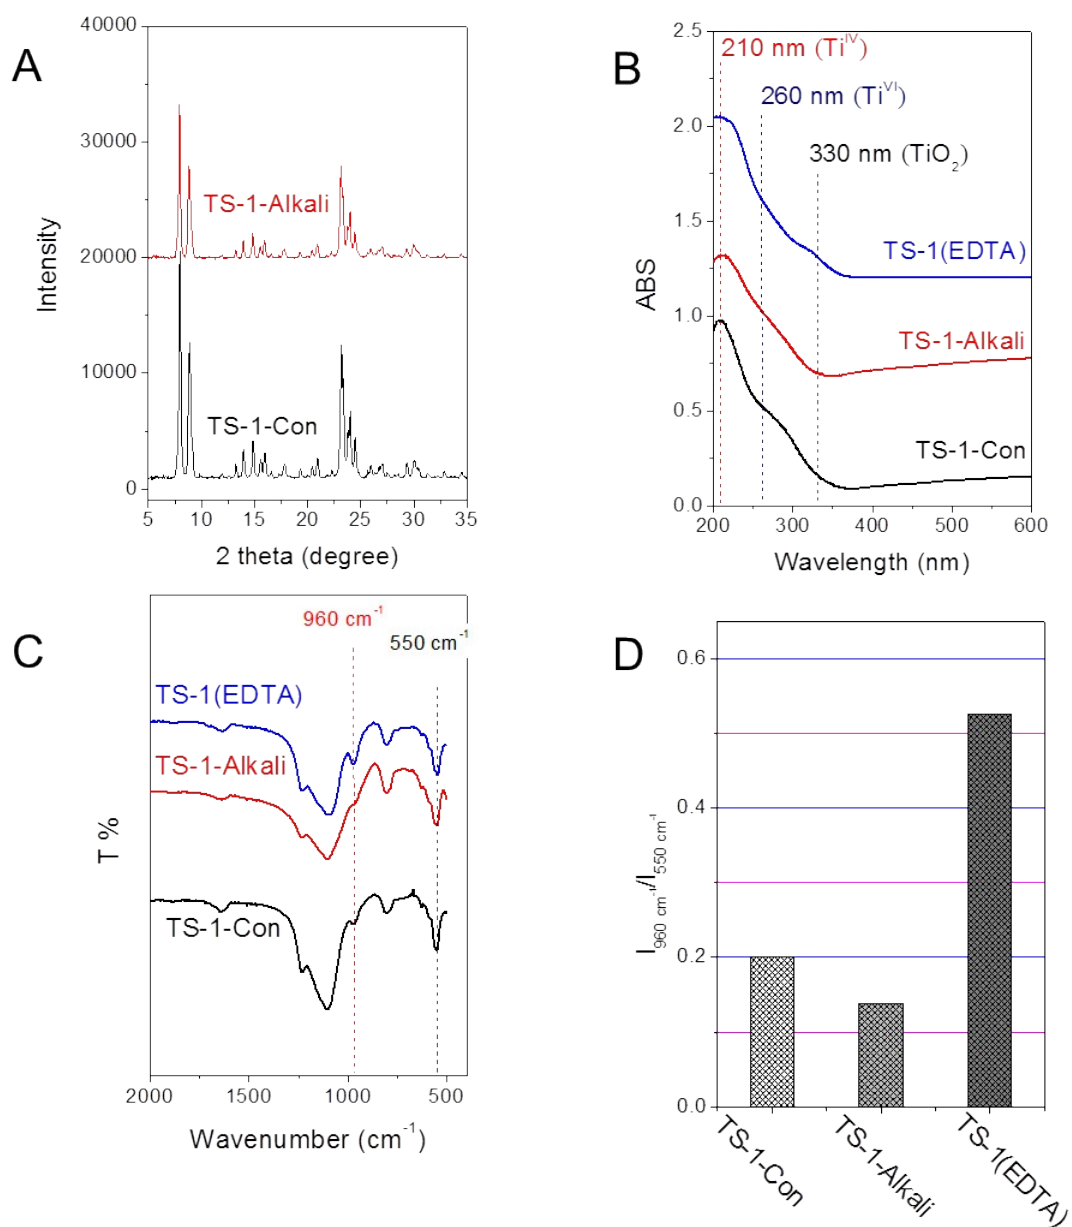

**Fig. S3** (A) XRD patterns, (B) DRUV-vis spectra, (C) IR spectra and (D) Intensity of  $960\text{ cm}^{-1}$  bands normalized to  $550\text{ cm}^{-1}$  in IR spectra of TS-1-Con, TS-1-Alkali and TS-1(EDTA).

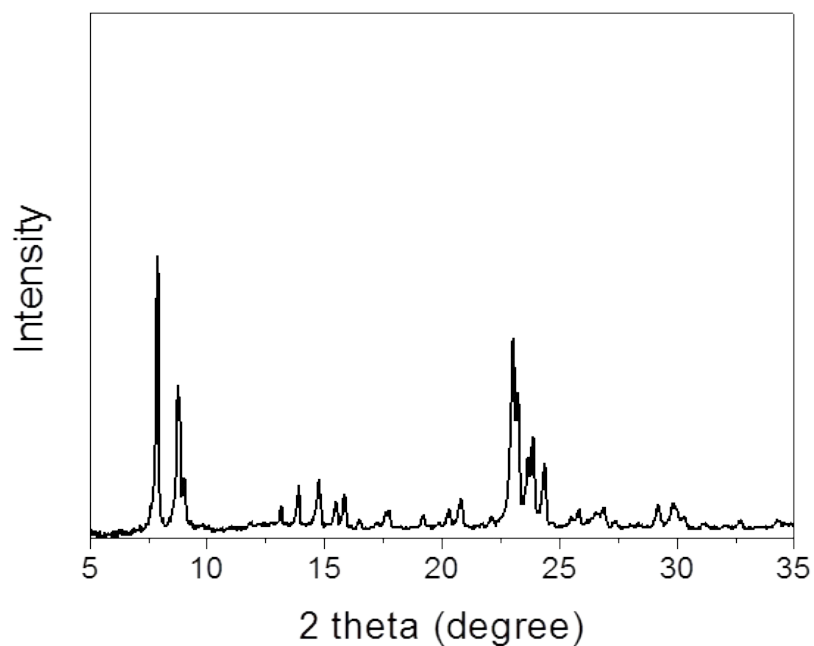

**Fig. S4** XRD pattern of TS-1(EDTA) after third use as catalyst for catalytic oxidation of 1-hexene with  $\text{H}_2\text{O}_2$ . Reaction conditions: catalyst (25 mg), methanol (5 mL), 1-hexene (5 mmol),  $\text{H}_2\text{O}_2$  (5 mmol), temperature 60 °C, 6 h.

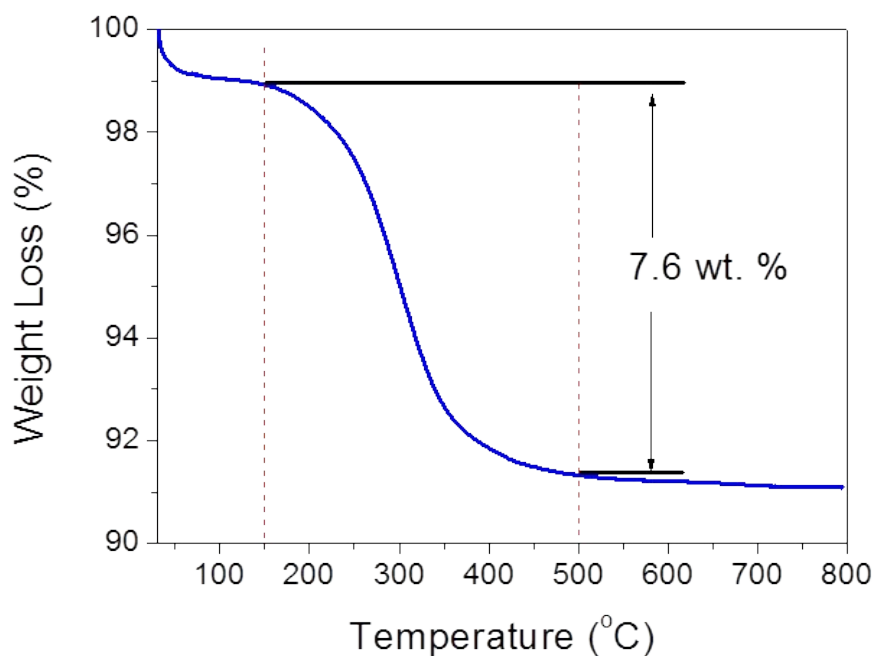

**Fig. S5** TG curve of TS-1(EDTA) after third use for catalytic oxidation of 1-hexene with  $\text{H}_2\text{O}_2$ . Reaction conditions: catalyst (25 mg), methanol (5 mL), 1-hexene (5 mmol),  $\text{H}_2\text{O}_2$  (5 mmol), temperature 60 °C, 6 h.

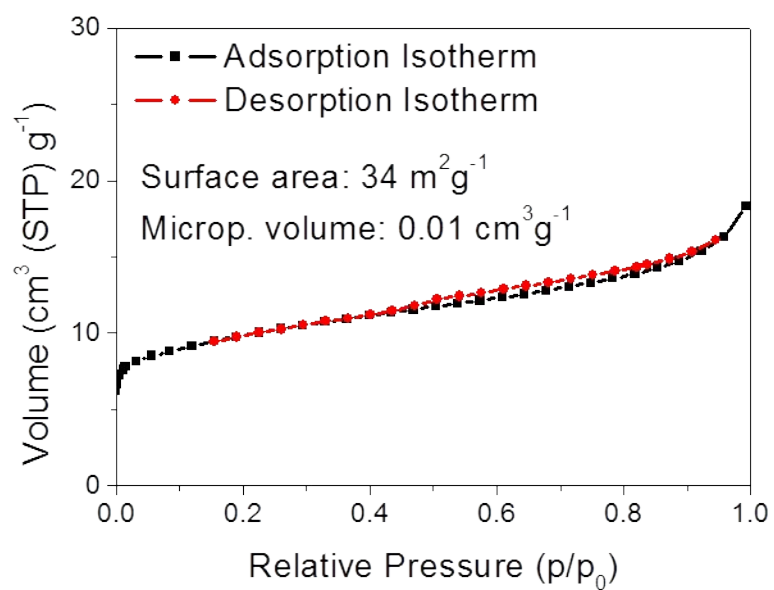

**Fig. S6** Nitrogen adsorption-desorption isotherms of TS-1(EDTA) after third use for catalytic oxidation of 1-hexene with H<sub>2</sub>O<sub>2</sub>. Reaction conditions: catalyst (25 mg), methanol (5 mL), 1-hexene (5 mmol), H<sub>2</sub>O<sub>2</sub> (5 mmol), temperature 60 °C, 6 h.
